# Supplementary material for: Structure Characterization, In Vitro Antioxidant and Anti-Tumor Activity of Sulfated Polysaccharide from Siraitia grosvenorii
Source: MDPI journal article supplement (doi:10.3390/foods12112133), 2023-05-25
Supplement: s1 [file s1]

## Supplementary Materials

**Table S1.** Primer sequence.

| Gene             | Primer sequences (5' to 3') |
|------------------|-----------------------------|
| <i>β-Actin-F</i> | CATGTACGTTGCTATCCAGGC       |
| <i>β-Actin-R</i> | CTCCTTAATGTCACGCACGAT       |
| <i>Bax-F</i>     | CCCGAGAGGTCTTTTCCGAG        |
| <i>Bax-R</i>     | CCAGCCCATGATGGTTCTGAT       |
| <i>Bcl-2-F</i>   | GGTGGGGTCATGTGTGTGG         |
| <i>Bcl-2-R</i>   | CGGTTCAAGTACTCAGTCATCC      |
| <i>CASP3-F</i>   | TTCAGAGGGGATCGTTGTAGAAGTC   |
| <i>CASP3-R</i>   | CAAGCTTGTCGGCATACTGTTTCAG   |
| <i>CASP9-F</i>   | CACCCAGACCAGTGGACATT        |
| <i>CASP9-R</i>   | TGCTCAGGATGTAAGCCAAATCT     |
| <i>Cyt-C-F</i>   | AACTGGCCTCTGACAGGCAAT       |
| <i>Cyt-C-R</i>   | TCAGTGGTGAAAGGCAGCATC       |
